# Supplementary material for: Unveiling the Cultivation of Nostoc sp. under Controlled Laboratory Conditions
Source: MDPI journal article supplement (doi:10.3390/biology13050306), 2024-04-28
Supplement: s1 [file s1]

**Table S1.** Chemical composition of the media used in the trials.

| <b>BG11 modified</b>                                | <b>Nutribloom</b><br>(Necton S.A.)                  | <b>Flora Nova Grow</b><br>(General Hydroponics)                    |
|-----------------------------------------------------|-----------------------------------------------------|--------------------------------------------------------------------|
| NaNO <sub>3</sub>                                   | NaNO <sub>3</sub>                                   | N (NH <sub>4</sub> <sup>+</sup> and NO <sub>3</sub> <sup>-</sup> ) |
| KH <sub>2</sub> PO <sub>4</sub>                     | KH <sub>2</sub> PO <sub>4</sub>                     | P <sub>2</sub> O <sub>5</sub>                                      |
| CaCl <sub>2</sub> ·2H <sub>2</sub> O                | ZnCl <sub>2</sub>                                   | K <sub>2</sub> O                                                   |
| ZnSO <sub>4</sub> ·7H <sub>2</sub> O                | ZnSO <sub>4</sub>                                   | SO <sub>4</sub>                                                    |
| MnCl <sub>2</sub> ·4H <sub>2</sub> O                | MnCl <sub>2</sub>                                   | CaO                                                                |
| Na <sub>2</sub> MoO <sub>4</sub> ·2H <sub>2</sub> O | Na <sub>2</sub> MoO <sub>4</sub> ·2H <sub>2</sub> O | MgO                                                                |
| CoCl <sub>2</sub> ·7H <sub>2</sub> O                | CoCl <sub>2</sub> ·6H <sub>2</sub> O                | Fe                                                                 |
| CuSO <sub>4</sub> ·5H <sub>2</sub> O                | CuSO <sub>4</sub> ·5H <sub>2</sub> O                |                                                                    |
| Na <sub>2</sub> EDTA                                | EDTA                                                |                                                                    |
| MgSO <sub>4</sub> ·7H <sub>2</sub> O                | MgSO <sub>4</sub>                                   |                                                                    |
| FeSO <sub>4</sub>                                   | FeCl <sub>3</sub>                                   |                                                                    |
| Citric Acid                                         | Thiamine                                            |                                                                    |
| H <sub>3</sub> BO <sub>3</sub>                      | Biotin                                              |                                                                    |
|                                                     | Vitamin B12                                         |                                                                    |
